# Supplementary material for: Effect of Marine-Derived n-3 Polyunsaturated Fatty Acids on C-Reactive Protein, Interleukin 6 and Tumor Necrosis Factor α: A Meta-Analysis
Source: PubMed Central journal article supplement (PMC3914936; doi:10.1371/journal.pone.0088103), 2014-02-05

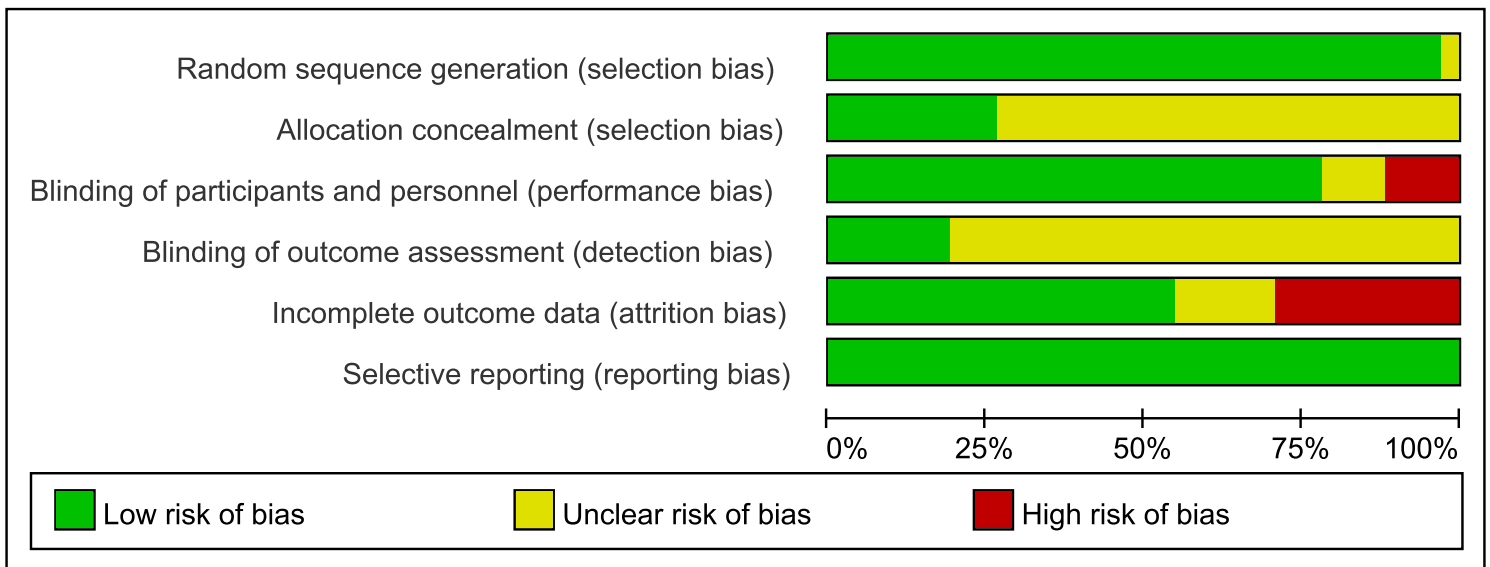

Supplement: pone.0088103.s001.pdf [file pone.0088103.s001.pdf]
