# Supplementary material for: Effect of Marine-Derived n-3 Polyunsaturated Fatty Acids on C-Reactive Protein, Interleukin 6 and Tumor Necrosis Factor α: A Meta-Analysis
Source: PubMed Central journal article supplement (PMC3914936; doi:10.1371/journal.pone.0088103), 2014-02-05
Supplement: pone.0088103.s002.pdf [file pone.0088103.s002.pdf]

|                           | Random sequence generation (selection bias) | Allocation concealment (selection bias) | Blinding of participants and personnel (performance bias) | Blinding of outcome assessment (detection bias) | Incomplete outcome data (attrition bias) | Selective reporting (reporting bias) |
|---------------------------|---------------------------------------------|-----------------------------------------|-----------------------------------------------------------|-------------------------------------------------|------------------------------------------|--------------------------------------|
| Barbosa et al.2003        | ?                                           | ?                                       | ?                                                         | ?                                               | ?                                        | ?                                    |
| Bent et al.2011           | ?                                           | ?                                       | ?                                                         | ?                                               | ?                                        | ?                                    |
| Bowden et al.2009         | ?                                           | ?                                       | ?                                                         | ?                                               | ?                                        | ?                                    |
| Bragt et al.2012          | ?                                           | ?                                       | ?                                                         | ?                                               | ?                                        | ?                                    |
| Browning et al.2007       | ?                                           | ?                                       | ?                                                         | ?                                               | ?                                        | ?                                    |
| Chan et al.2002           | ?                                           | ?                                       | ?                                                         | ?                                               | ?                                        | ?                                    |
| Chiang et al.2012         | ?                                           | ?                                       | ?                                                         | ?                                               | ?                                        | ?                                    |
| Clubotaru et al.2003      | ?                                           | ?                                       | ?                                                         | ?                                               | ?                                        | ?                                    |
| Damsgaard et al.2008      | ?                                           | ?                                       | ?                                                         | ?                                               | ?                                        | ?                                    |
| Daud et al.2012           | ?                                           | ?                                       | ?                                                         | ?                                               | ?                                        | ?                                    |
| De Mello et al.2009       | ?                                           | ?                                       | ?                                                         | ?                                               | ?                                        | ?                                    |
| Derosa et al.2009         | ?                                           | ?                                       | ?                                                         | ?                                               | ?                                        | ?                                    |
| Derosa et al.2012         | ?                                           | ?                                       | ?                                                         | ?                                               | ?                                        | ?                                    |
| Deutsch et al.2007        | ?                                           | ?                                       | ?                                                         | ?                                               | ?                                        | ?                                    |
| Engler et al.2004         | ?                                           | ?                                       | ?                                                         | ?                                               | ?                                        | ?                                    |
| Faghihi et al.2012        | ?                                           | ?                                       | ?                                                         | ?                                               | ?                                        | ?                                    |
| Faxen Irving et al.2009   | ?                                           | ?                                       | ?                                                         | ?                                               | ?                                        | ?                                    |
| Freund-Levi et al.2009    | ?                                           | ?                                       | ?                                                         | ?                                               | ?                                        | ?                                    |
| Fujoka et al.2006         | ?                                           | ?                                       | ?                                                         | ?                                               | ?                                        | ?                                    |
| Gammelmark et al.2012     | ?                                           | ?                                       | ?                                                         | ?                                               | ?                                        | ?                                    |
| Geelen et al.2004         | ?                                           | ?                                       | ?                                                         | ?                                               | ?                                        | ?                                    |
| Jones et al.2007          | ?                                           | ?                                       | ?                                                         | ?                                               | ?                                        | ?                                    |
| Kabir et al.2007          | ?                                           | ?                                       | ?                                                         | ?                                               | ?                                        | ?                                    |
| Kiecolt-Glaser et al.2011 | ?                                           | ?                                       | ?                                                         | ?                                               | ?                                        | ?                                    |
| Kiecolt-Glaser et al.2012 | ?                                           | ?                                       | ?                                                         | ?                                               | ?                                        | ?                                    |
| Koh et al.2012            | ?                                           | ?                                       | ?                                                         | ?                                               | ?                                        | ?                                    |
| Kolahi et al.2010         | ?                                           | ?                                       | ?                                                         | ?                                               | ?                                        | ?                                    |
| Kooshki et al.2011        | ?                                           | ?                                       | ?                                                         | ?                                               | ?                                        | ?                                    |
| Krebs et al.2006          | ?                                           | ?                                       | ?                                                         | ?                                               | ?                                        | ?                                    |
| Krysiak et al.2011 a      | ?                                           | ?                                       | ?                                                         | ?                                               | ?                                        | ?                                    |
| Krysiak et al.2011 b      | ?                                           | ?                                       | ?                                                         | ?                                               | ?                                        | ?                                    |
| Krysiak et al.2012 a      | ?                                           | ?                                       | ?                                                         | ?                                               | ?                                        | ?                                    |
| Krysiak et al.2012 b      | ?                                           | ?                                       | ?                                                         | ?                                               | ?                                        | ?                                    |
| Lenz et al.2002           | ?                                           | ?                                       | ?                                                         | ?                                               | ?                                        | ?                                    |
| Lindqvist et al.2007      | ?                                           | ?                                       | ?                                                         | ?                                               | ?                                        | ?                                    |
| Mackay et al.2012         | ?                                           | ?                                       | ?                                                         | ?                                               | ?                                        | ?                                    |
| Madsen et al.2003         | ?                                           | ?                                       | ?                                                         | ?                                               | ?                                        | ?                                    |
| Madsen et al.2007         | ?                                           | ?                                       | ?                                                         | ?                                               | ?                                        | ?                                    |
| Malekshahi et al.2012     | ?                                           | ?                                       | ?                                                         | ?                                               | ?                                        | ?                                    |
| Mann et al.2010           | ?                                           | ?                                       | ?                                                         | ?                                               | ?                                        | ?                                    |
| Mocking et al.2012        | ?                                           | ?                                       | ?                                                         | ?                                               | ?                                        | ?                                    |
| Moerti et al.2011         | ?                                           | ?                                       | ?                                                         | ?                                               | ?                                        | ?                                    |
| Mohammadi et al.2012      | ?                                           | ?                                       | ?                                                         | ?                                               | ?                                        | ?                                    |
| Mori et al.2003           | ?                                           | ?                                       | ?                                                         | ?                                               | ?                                        | ?                                    |
| Mori et al.2009           | ?                                           | ?                                       | ?                                                         | ?                                               | ?                                        | ?                                    |
| Munro et al.2012          | ?                                           | ?                                       | ?                                                         | ?                                               | ?                                        | ?                                    |
| Murphy et al.2007         | ?                                           | ?                                       | ?                                                         | ?                                               | ?                                        | ?                                    |
| Nodari et al.2009         | ?                                           | ?                                       | ?                                                         | ?                                               | ?                                        | ?                                    |
| Nodari et al.2011         | ?                                           | ?                                       | ?                                                         | ?                                               | ?                                        | ?                                    |
| Ottestad et al.2012       | ?                                           | ?                                       | ?                                                         | ?                                               | ?                                        | ?                                    |
| Pooya et al.2010          | ?                                           | ?                                       | ?                                                         | ?                                               | ?                                        | ?                                    |
| Pot et al.2009            | ?                                           | ?                                       | ?                                                         | ?                                               | ?                                        | ?                                    |
| Ramel et al.2010          | ?                                           | ?                                       | ?                                                         | ?                                               | ?                                        | ?                                    |
| Rizza et al.2009          | ?                                           | ?                                       | ?                                                         | ?                                               | ?                                        | ?                                    |
| Sabour et al.2012         | ?                                           | ?                                       | ?                                                         | ?                                               | ?                                        | ?                                    |
| Saifullah et al.2007      | ?                                           | ?                                       | ?                                                         | ?                                               | ?                                        | ?                                    |
| Sanders et al.2006        | ?                                           | ?                                       | ?                                                         | ?                                               | ?                                        | ?                                    |
| Shahbakhti et al.2004     | ?                                           | ?                                       | ?                                                         | ?                                               | ?                                        | ?                                    |
| Skulas-Ray et al.2011     | ?                                           | ?                                       | ?                                                         | ?                                               | ?                                        | ?                                    |
| Theobald et al.2007       | ?                                           | ?                                       | ?                                                         | ?                                               | ?                                        | ?                                    |
| Thusgaard et al.2009      | ?                                           | ?                                       | ?                                                         | ?                                               | ?                                        | ?                                    |
| Tierney et al.2011        | ?                                           | ?                                       | ?                                                         | ?                                               | ?                                        | ?                                    |
| Vega-Lopez et al.2004     | ?                                           | ?                                       | ?                                                         | ?                                               | ?                                        | ?                                    |
| Watanabe et al.2009       | ?                                           | ?                                       | ?                                                         | ?                                               | ?                                        | ?                                    |
| Wong et al.2010           | ?                                           | ?                                       | ?                                                         | ?                                               | ?                                        | ?                                    |
| Wright et al.2008         | ?                                           | ?                                       | ?                                                         | ?                                               | ?                                        | ?                                    |
| Zhang et al.2012          | ?                                           | ?                                       | ?                                                         | ?                                               | ?                                        | ?                                    |
| Zhao et al.2009           | ?                                           | ?                                       | ?                                                         | ?                                               | ?                                        | ?                                    |
